# Supplementary material for: The mechanism of a PVDF/CsPbBr3 perovskite composite fiber as a self-polarization piezoelectric nanogenerator with ultra-high output voltage
Source: Royal Society of Chemistry journal article supplement (doi:10.1039/d2ta03559f), 2022-01-01
Supplement: d2ta03559f1.pdf [file d2ta03559f1.pdf]

## Supplementary Information

### **The mechanism of PVDF/CsPbBr<sub>3</sub> perovskite composite fiber as self-polarization piezoelectric nanogenerator with ultra-high output voltage**

You Xue,<sup>a</sup> Tao Yang,<sup>\*a</sup> Yapeng Zheng,<sup>a</sup> Enhui Wang,<sup>a</sup> Hongyang Wang,<sup>b</sup> Laipan Zhu,<sup>c</sup> Zhentao Du,<sup>d</sup> Xinmei Hou,<sup>\*a</sup> Kuo-Chih Chou<sup>a</sup>

<sup>a</sup> *Beijing Advanced Innovation Center for Materials Genome Engineering, Collaborative Innovation Center of Steel Technology, University of Science and Technology Beijing, Beijing 100083, China*

<sup>b</sup> *State Key Laboratory of Environmental Criteria and Risk Assessment, Chinese Research Academy of Environmental Sciences, Beijing 100012, China*

<sup>c</sup> *Beijing Institute of Nanoenergy and Nanosystems, Chinese Academy of Sciences, Beijing 100083, China*

<sup>d</sup> *MOE Key Laboratory of New Processing Technology for Non-ferrous Metals and Materials, Guangxi Key Laboratory of Processing for Non-ferrous Metals and Featured Materials, Guangxi University, Nanning 530004, China*

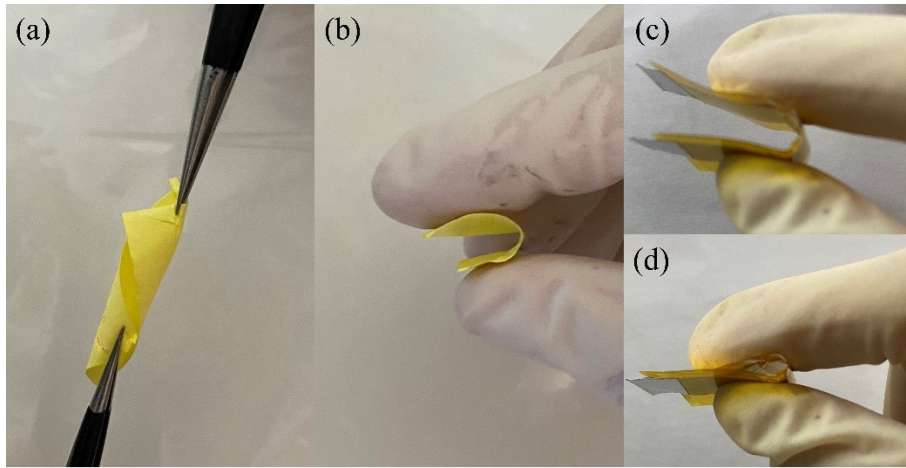

**Fig. S1** Flexibility tests of films (a,b) and devices(c,d).

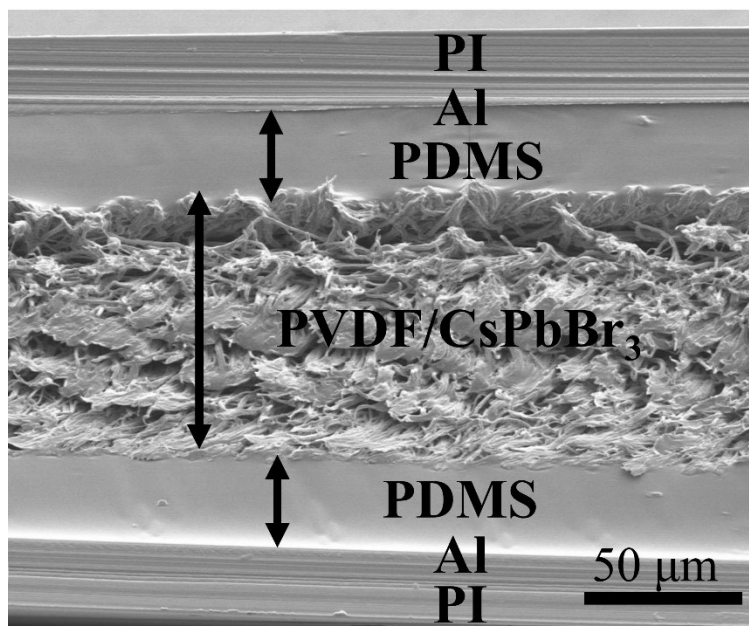

**Fig. S2** The cross-section SEM image of the PVDF/CsPbBr<sub>3</sub>-PENG.

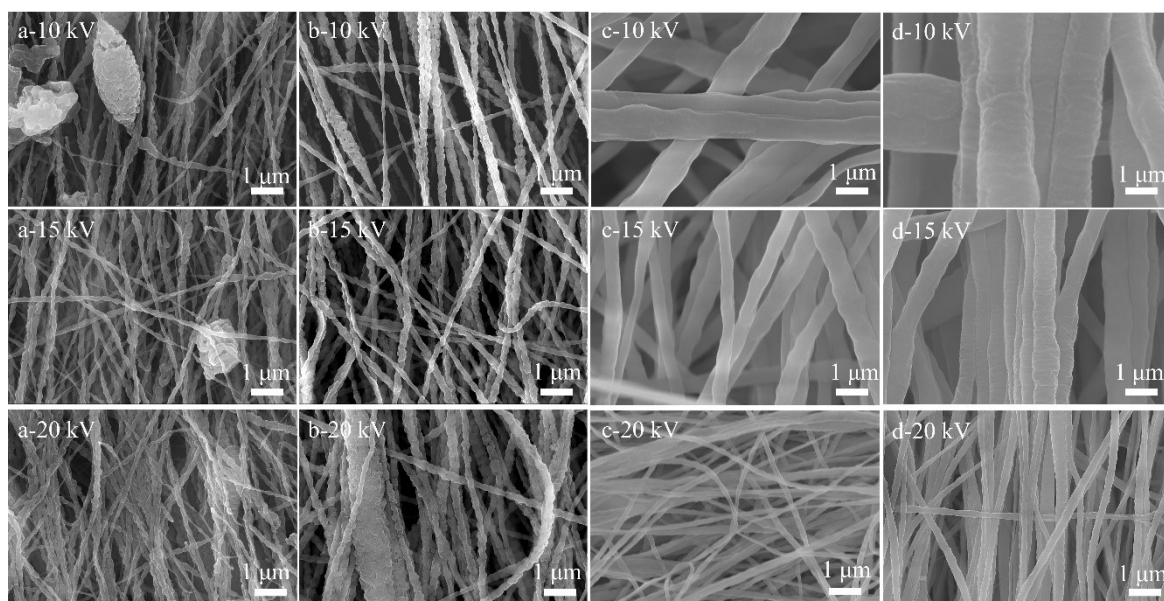

**Fig. S3** Typical SEM images of PVDF fiber under different conditions. The concentration of PVDF is 10%(a), 12%(b) and 14%(c), 16%(d). 10 kV, 15 kV, and 20 kV are the voltage value for electrospinning setting.

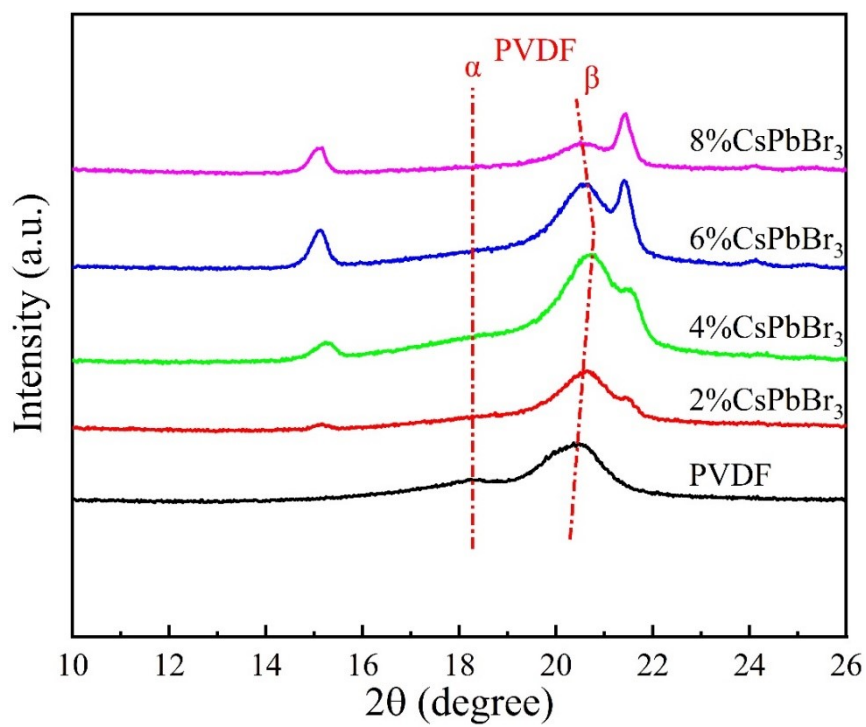

Fig. S4 Magnified view of XRD pattern.

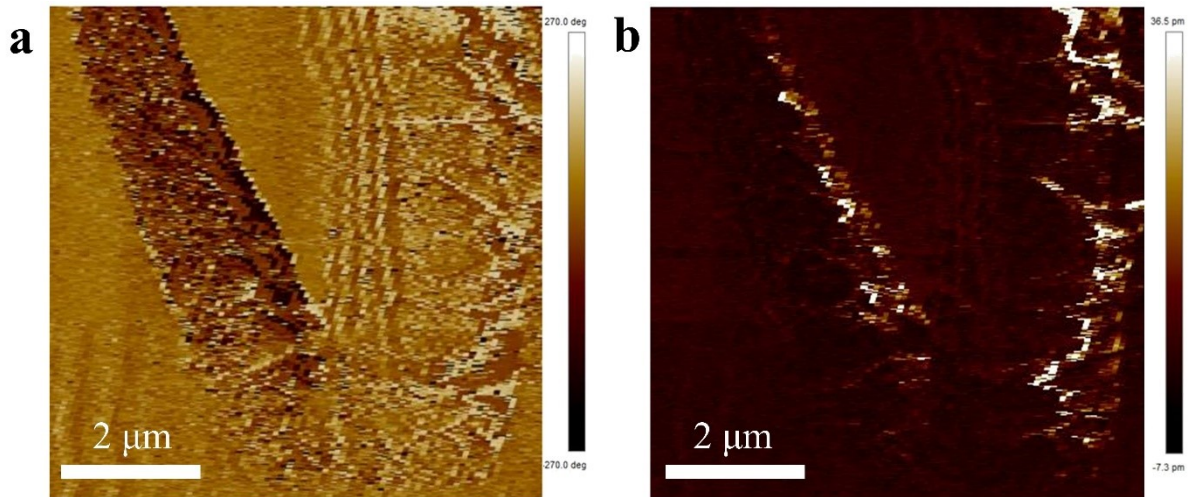

**Fig. S5** PFM phase and amplitude image of PVDF/4%CsPbBr<sub>3</sub> fiber.

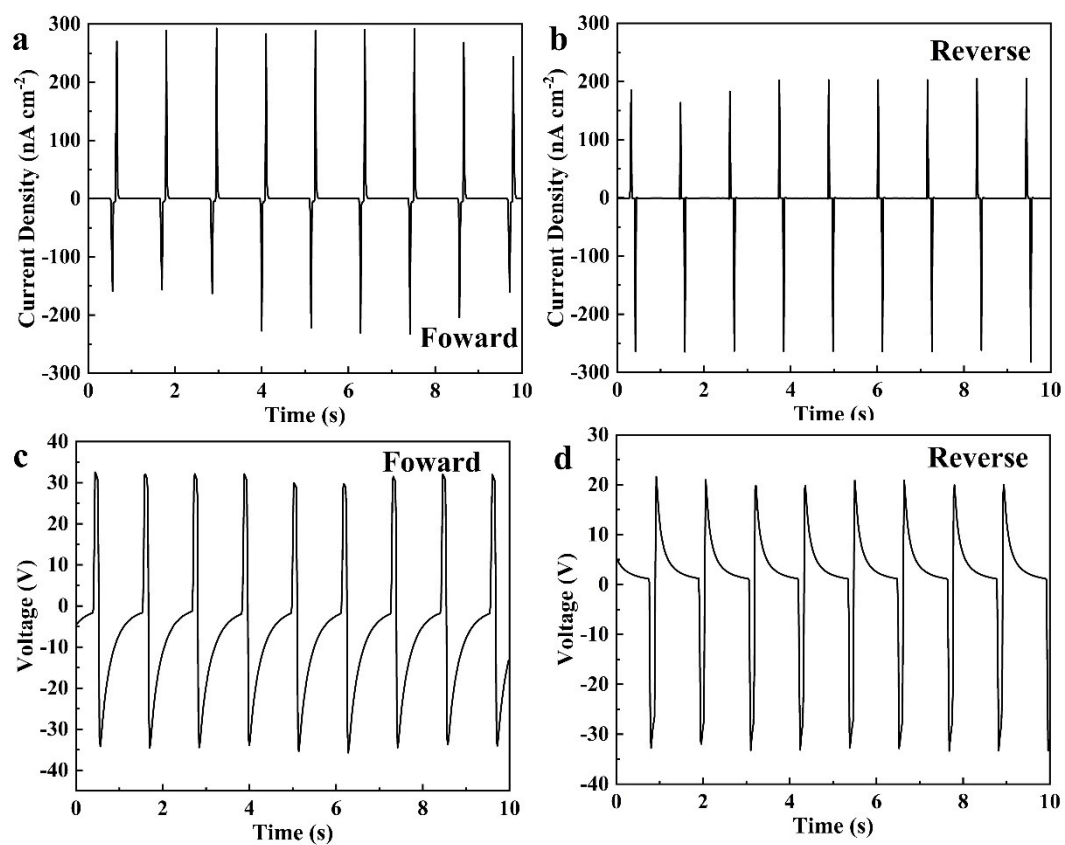

**Fig. S6** Piezoelectric output density of short-circuit current ( $I_{sc}$ ) of PVDF/4%CsPbBr<sub>3</sub> PENG under forward(a) and reverse(b) connection. Open-circuit voltage ( $V_{oc}$ ) in of PVDF/4%CsPbBr<sub>3</sub> PENG under forward(c) and reverse(d) connection.

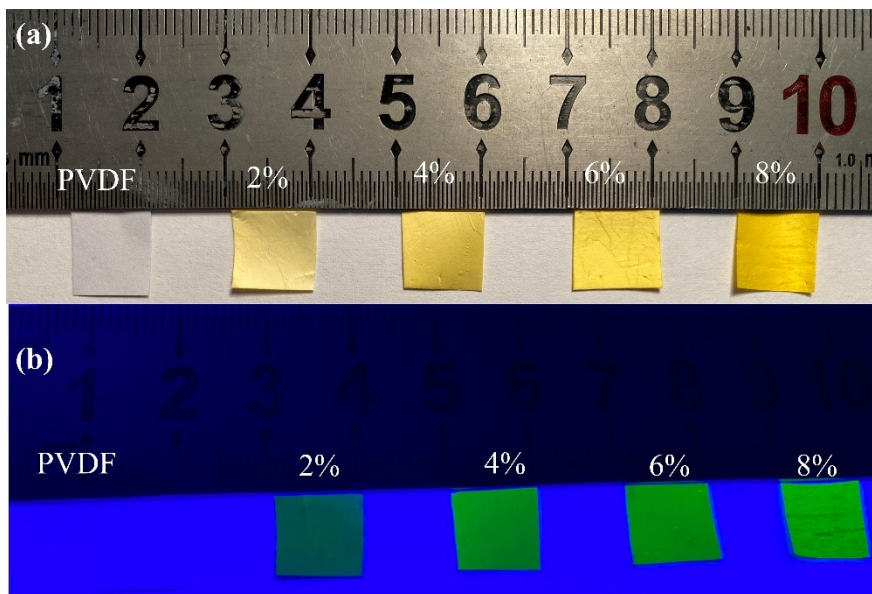

**Fig. S7** Optical image display of pure PVDF and PVDF/CsPbBr<sub>3</sub> fiber films under normal light(a) and 365 nm UV light(b).



**Table S1** The content of  $\beta$  phase of PVDF and composite fibers.

| Samples                         | PVDF | PVDF -<br>2%CsPbBr <sub>3</sub> | PVDF -<br>4%CsPbBr <sub>3</sub> | PVDF -<br>6%CsPbBr <sub>3</sub> | PVDF -<br>8%CsPbBr <sub>3</sub> |
|---------------------------------|------|---------------------------------|---------------------------------|---------------------------------|---------------------------------|
| Content of $\beta$<br>phase [%] | 78.7 | 94.3                            | 94.6                            | 94.5                            | 94.3                            |
